# Supplementary material for: Arsenic Concentration in the Surface Water of a Former Mining Area: The La Junta Creek, Baja California Sur, Mexico
Source: Int J Environ Res Public Health. 2018 Mar 2;15(3):437. doi: 10.3390/ijerph15030437 (PMC5876982; doi:10.3390/ijerph15030437)
Supplement: Supplementary file 1 [file ijerph-15-00437-s001.xlsx]

## Sheet: Stations
Station	TYPE	x_utm	y_utm	Altitude	Temp. Field	pH	Redox	Oxygen	pH	C.E.	TDS	Cl	HCO3	Fluoruros	Sulfatos	Demandaquimicadeoxigeno	BORO	Li_dissolved	Li_total	Na_dissolved	Na_total	Mn_dissolved	Mn_total	K_dissolved	K_total	Ca_dissolved	Ca_total	V_dissolved	V_total	Mn_dissolved	Mn_total	Zn_dissolved	Zn_total	As_dissolved	As_total	Sr_dissolved	Sr_total	Mo_dissolved	Mo_total	Ba_dissolved	Ba_total	Charge balance error
		m	m	m	˚C		mV	mg/L	Lab	µS	mg/L	mg/L	mg/L	mg/L	mg/L	mg/L	mg/L	mg/L	mg/L	mg/L	mg/L	mg/L	mg/L	mg/L	mg/L	mg/L	mg/L	mg/L	mg/L	mg/L	mg/L	mg/L	mg/L	mg/L	mg/L	mg/L	mg/L	mg/L	mg/L	mg/L	mg/L
N-1	Arroyo (creek)	591872	2616016	510	29.5	8.06	31.5	5.9	7.81	1275	948	108.06	317.01	0.485	245.92	14.74	0.19	0.005143	0.005	92.48	101	50.892	50.892	3.939	4.374	159.43	159.43	0.01136	0.01296	0.172	0.1853	0.006472	0.009605	0.01478	0.01656	0.8753	0.9462	0.00517	0.005	0.1083	0.1309	5.51%
N-2	Arroyo (creek)	593456	2615744	510	27.5	8.5	26.8	3.6	7.7	842	584	67.99	257.41	0.587	67.99	12.35	0.37	0.005	0.005	78.8	85.5	32.562	32.562	4.049	4.831	88.9	92.04	0.005599	0.006266	0.06948	0.05434	0.005	0.006139	0.01161	0.01212	0.549	0.5511	0.009707	0.009223	0.1281	0.1408	4.49%
N-3	Arroyo (creek)	597146	2.61678e+06	435	23	8.165	-33.3	5.1	7.83	902	532	104.22	257.11	0.803	119.74	14	0.57	0.006865	0.0071	97.12	108.3	35.372	35.372	4.175	4.452	104.09	88.97	0.005	0.005129	0.04139	0.03313	0.006556	0.006047	0.02258	0.02789	0.5629	0.61	0.008213	0.007589	0.1079	0.131	2.39%
N-4	Arroyo (creek)	591953	2615880	423	26	8.26	-107.2	6.1	8.17	1060	656	148.52	243.97	0.776	158.89	17.2	0.25	0.005	0.005	113.1	132.3	51.992	51.992	4.144	5.129	130.33	98.46	0.006662	0.00711	0.04895	0.04149	0.01007	0.00629	0.03614	0.03947	0.6761	0.7715	0.008656	0.009047	0.1175	0.149	7.63%
N-5	Arroyo (creek)	595404	2615828	480	28.6	8.17	-29	8.1	9.74	339	212	46.9	79.2	2.135	35.005	5	0.27	0.006998	0.006556	69.08	68.7	28.272	28.272	4.479	4.453	63.75	63.02	0.007751	0.008374	0.02533	0.02308	0.005298	0.01005	0.007309	0.0088	0.3793	0.3648	0.007753	0.00705	0.10363	0.1121	5.81%
N-6	Arroyo (creek)	597146	2.61678e+06	566	24.6	7.12	202	1.4	7.36	627	412	32.83	243.58	0.529	49.73	5	0.25	0.01431	0.01434	48.4417	48.3717	24.748	26.978	3.67003	7.60503	74.4238	76.4438	0.009756	0.0104	0.0146	0.01872	0.01581	0.007555	0.005292	0.005418	0.2869	0.2898	0.005967	0.005663	0.1442	0.125	-0.27%
N-7	Arroyo (creek)	596089	2.61723e+06	429	28.4	8.06	206	4.3	8.01	806	524	67.74	270.24	0.743	62.583	5.2	0.37	0.007368	0.007424	74.7517	74.7217	35.128	37.158	3.71303	3.94403	90.2138	89.0438	0.005651	0.005713	0.03985	0.06508	0.02015	0.01296	0.01356	0.01386	0.4211	0.4182	0.006726	0.006982	0.1257	0.1035	3.91%
N-8	Arroyo (creek)	596262	2.61739e+06	615	26.9	8	71.4	3.4	7.89	816	496	65.66	282.58	0.759	53.5	12.2	0.3	0.009475	0.00945	74.7217	74.9017	35.048	35.558	3.91903	3.88803	85.5138	89.7338	0.005	0.002776	0.07213	0.1639	0.03368	0.007786	0.01771	0.01923	0.3958	0.4143	0.006663	0.006377	0.1073	0.0892	2.45%
N-9	Arroyo (creek)	581381	2.6127e+06	212	27	7.57	-159	1.2	7.85	1037	644	114.65	232.03	0.526	159.87	5	0.48	0.005	0.005	88.5	90.5	34	37	5.24	5.87	95.2	98.4	0.005	0.005	0.26	0.27	0.014	0.074	0.018	0.017	0.64	0.66	0.0079	0.005	0.15	0.15	-3.28%
N-13	Arroyo (creek)	596089	2.61723e+06	429	26	7.9	190	3.5	7.9	714	448	519.66	256.81	0.693	75.17	5	0.13	0.0081	0.0077	55.7	64.7	26.4	26.5	2.08	1.37	56.4	61.8	0.011	0.011	0.0083	0.0093	0.016	0.005	0.0094	0.01	0.34	0.36	0.005	0.005	0.086	0.086	-11.36%
R-6	Shallow well	597000	2.6202e+06	681	21.6	7.66	230	1	7.5	965	600	78.17	342.08	0.496	74.495	5	0.16	0.01924	0.01932	82.0717	86.0017	40.568	42.838	5.37503	5.48203	107.538	109.938	0.0122	0.013	0.04307	0.04612	0.01555	0.01048	0.01832	0.01939	0.6187	0.6371	0.005	0.005	0.1117	0.09541	1.12%
R-7	Shallow well	597627	2.61965e+06	662	22.8	7.186	192	0.8	7.31	746	448	65.14	269.45	0.622	49.965	5	0.14	0.0195	0.02041	67.7017	64.0217	25.948	26.348	2.70803	2.81703	95.9738	90.9738	0.007044	0.00762	0.04371	0.048	0.01483	0.007337	0.007807	0.007821	0.3347	0.3158	0.005508	0.005442	0.1151	0.09248	2.11%
R-9	Shallow well	597916	2.61736e+06	611	24.4	7.3	238	1.9	7.46	779	492	54.72	322.98	0.468	46.665	5	0.2	0.03081	0.04389	65.4717	69.1717	35.008	25.688	3.75203	2.07903	108.938	100.218	0.005	0.006813	0.03697	0.02893	0.02121	0.009333	0.005	0.005	0.3384	0.29	0.005	0.006439	0.1117	0.009189	3.68%
R-10	Shallow well	597660	2.61723e+06	591	22.2	7.33	166.8	1.5	7.44	854	520	71.65	333.42	0.507	51.38	5	0.12	0.04325	0.0313	66.6017	69.1617	25.688	34.648	2.00803	3.80203	98.1738	106.838	0.006507	0.005	0.02787	0.05144	0.01729	0.01422	0.005	0.005	0.281	0.3494	0.006869	0.005	0.03105	0.09385	-6.28%
R-12	Shallow well	596931	2.61711e+06	562	20.5	7.1	203.7	1.3	7.55	765	480	50.55	290.34	0.644	54.8	5	0.36	0.01339	0.01279	66.3517	68.3517	31.498	34.348	3.34603	4.05903	87.5638	90.4438	0.008243	0.008162	0.2139	0.2274	0.02406	0.02016	0.007405	0.007979	0.3964	0.3975	0.007316	0.006762	0.1375	0.1146	0.97%
R-13	Shallow well	598463	2.61609e+06	615	20.8	7.5	175.9	2.2	7.62	735	468	47.42	328.05	0.095	23.76	98	0.24	0.02629	0.01979	68.0817	57.7617	23.088	19.018	3.65003	5.25503	98.5638	82.5738	0.005	0.005	0.2729	0.1135	0.09552	0.009176	0.05186	0.03894	0.2796	0.2327	0.005	0.006942	0.1027	0.02985	-0.10%
R-18	Shallow well	586691	2.61467e+06	340	25	7.45	107	0.7	7.31	1281	756	138.41	327.55	0.661	156.215	5	1.09	0.0075	0.0072	95.1	98.1	46.5	48.8	4.65	1.49	117	130	0.026	0.0066	0.019	0.015	0.048	0.12	0.0055	0.005	0.8	0.85	0.015	0.005	0.16	0.14	-4.72%
R-19	Shallow well	592380	2.61424e+06	340	24.6	7.11	110.3	1	7.28	790	504	52.45	296.31	0.463	48.905	5	0.1	0.013	0.0082	56.1	57	22.1	22.3	1.66	1.98	91.4	93.8	0.012	0.0079	0.02	0.005	0.036	0.012	0.008	0.005	0.46	0.47	0.015	0.005	0.1	0.057	-4.88%
R-20	Shallow well	594257	2.61517e+06	687	25.2	7.3	184	2	7.24	550	336	31.08	215.52	0.378	28.366	5	0.1	0.024	0.0051	40.4	38.3	19.7	20.6	2.08	2.03	55.1	54.3	0.0062	0.009	0.005	0.04	0.038	0.01	0.005	0.005	0.31	0.31	0.006	0.005	0.035	0.065	-4.44%

## Sheet: Temporal variations
		SAMPLING SITE DATA		FIELD DATA									LABORATORIES DATA
		GEOGRAPHIC DATA		SAMPLE DATE					PHYSICOCHEMICAL PARAMETERS				METALS																					ANIONS							CATIONS				OTHERS
Muestra ID	Name	Coordenadas UTM		Sampling by	Date of sampling	Time of sampling	Reception date	Laboratories	pH Field	Temp. Field	EC Field	O2	Al	Sb	As	Ba	Be	Cd	Cr	Co	Cu	Fe	Pb	Mn	Hg	Mo	Zn	B	P	Ag	Si	Ni	Se	Bicarbonates	Carbonates	Nitrates	Nitrites	Sulfates	Chloridos	Fluoridos	Ca	K	Na	Mg	NH4	Cyanide	Total Suspended Solids	Total Dissolved Solids	Fecal Coliforms
		x	y		dd/mm/aaaa					°C	µS/cm	mg/l	mg/l	mg/l	mg/l	mg/l	mg/l	mg/l	mg/l	mg/l	mg/l	mg/l	mg/l	mg/l	mg/l	mg/l	mg/l	mg/l	mg/l	mg/l	mg/l	mg/l	mg/l	mg/l	mg/l	mg/l	mg/l	mg/l	mg/l	mg/l	mg/l	mg/l	mg/l	mg/l			mg/l	mg/l	NMP/100ml
AG-AS3	Arroyo La Junta	594388	2617583	Baudilio Acosta (CIBNOR)	2010-05-18	12:37:00	2010-05-18	CIBNOR/ASA/ALS	7.87	28.3	800	4.43	0.069	<0.005	0.0071	0.084	<0.005	<0.005	<0.005	<0.005	<0.005	<0.50	<0.005	0.021	<0.00067	<0.005	0.03	0.21	n/a	<0.005	n/a	<0.005	<0.005	238.68	<1	n/a	n/a	42.14	46.26	0.2	69.8	2.57	49.8	20.5	n/a	<.008	<9	453	93
AG-AS3	Arroyo La Junta	594388	2617583	Baudilio Acosta (CIBNOR)	2010-06-16	11:58:00	2010-06-16	CIBNOR/ASA/ALS	7.76	26.3	725	5.1	<0.05	<0.005	0.0076	0.12	<0.005	<0.005	<0.005	<0.005	<0.005	<0.50	<0.005	0.022	<0.00067	0.0059	0.014	0.12	n/a	<0.005	n/a	<0.005	<0.005	242.08	<1	n/a	n/a	73.65	40.13	0.46	70.4	4.83	53.6	26.5	n/a	<0.008	<9	443	1100
AG-AS3	Arroyo La Junta	594388	2617583	Baudilio Acosta (CIBNOR)	2010-07-13	11:29:00	2010-07-13	CIBNOR/ASA/ALS	7.87	30.7	715	4.3	<0.05	<0.005	0.012	0.1	<0.005	<0.005	<0.005	<0.005	<0.005	<0.50	<0.005	0.028	<0.00067	0.006	0.011	0.5	n/a	<0.005	n/a	<0.005	<0.005	247.86	<1	n/a	n/a	32.4	52.51	0.43	59.7	4.39	45.9	23.2	n/a	<0.008	<9	438	>2400
AG-AS3	Arroyo La Junta	594388	2617583	Iban Murillo (CIBNOR)	2010-08-18	10:30:00	2010-08-19	CIBNOR/ASA/ALS	7.59	28.4	790	7.07	0.05	<0.005	0.012	0.1	<0.005	<0.005	<0.005	<0.005	<0.005	<0.50	<0.005	0.044	<0.00067	0.0053	<0.005	0.13	n/a	<0.005	n/a	<0.005	<0.005	250.19	<1	n/a	n/a	73.1	63.58	0.37	74.1	3.68	50.7	26.2	n/a	<0.008	<9	543	460
AG-AS3	Arroyo La Junta	594388	2617583	Iban Murillo (CIBNOR)	2010-09-23	11:55:00	2010-09-23	CIBNOR/ASA/ALS	7.86	25.4	758	6.4	<0.05	<0.005	0.012	0.11	<0.005	<0.005	<0.005	<0.005	<0.005	<0.15	<0.005	0.089	<0.00067	0.0061	0.015	0.48	n/a	<0.005	n/a	<0.005	<0.005	238.8	<1	n/a	n/a	41.32	63.5	0.33	76.3	4.75	55.4	29.7	n/a	<0.008	41	441	15
AG-AS3	Arroyo La Junta	594388	2617583	Iban Murillo (CIBNOR)	2010-10-21	10:50:00	2010-10-21	CIBNOR/ASA/ALS	8.22	25	695	7.62	0.054	<0.005	0.0084	0.13	<0.005	<0.005	<0.005	<0.005	<0.005	<0.15	<0.005	0.031	<0.00067	0.0063	0.013	0.73	n/a	<0.005	n/a	<0.005	<0.005	239.99	<1	n/a	n/a	43.82	42.3	0.17	81.5	3.78	62.2	31.2	n/a	<0.008	46	410	1100
AG-AS3	Arroyo La Junta	594388	2617583	Iban Murillo (CIBNOR)	2010-11-25	11:15:00	2010-11-25	CIBNOR/ASA/ALS	8.26	24.5	315	8.01	<0.05	<0.005	0.0083	0.092	<0.005	<0.005	<0.005	<0.005	<0.005	0.15	<0.005	0.014	<0.00067	0.0061	0.013	0.35	n/a	<0.005	n/a	<0.005	<0.005	224.73	<1	n/a	n/a	38.1	47.15	0.76	56.6	0.83	41	24.6	n/a	<0.008	90	304	93
AG-AS3	Arroyo La Junta	594388	2617583	Iban Murillo (CIBNOR)	2011-01-19	09:30:00	2011-01-19	CIBNOR/ASA/ALS	8.12	20.1	691	9.82	<0.05	<0.005	0.0072	0.11	<0.005	<0.005	<0.005	<0.005	<0.005	<0.15	<0.005	0.0065	<0.00067	0.0058	0.0077	0.36	n/a	<0.005	n/a	<0.005	<0.005	245.72	n/a	n/a	n/a	41.49	36.69	0.25	65.2	4.82	49.3	27.5	n/a	<0.008	<5	446	>2400
AG-AS1	Arroyo La Junta	592023	2616906	Baudilio Acosta (CIBNOR)	2010-05-18	08:35:00	2010-05-18	CIBNOR/ASA/ALS	7.82	22	1180	4.2	0.094	<0.005	0.016	0.01	<0.005	<0.005	<0.005	<0.005	0.0087	<0.50	<0.005	0.017	<0.00067	0.0062	0.02	0.26	n/a	<0.005	n/a	<0.005	<0.005	237.25	<1	n/a	n/a	60.97	64.43	0.35	84.1	3.15	81.5	26.1	n/a	<.008	<9	484	43
AG-AS1	Arroyo La Junta	592023	2616906	Baudilio Acosta (CIBNOR)	2010-06-15	10:38:00	2010-06-15	CIBNOR/ASA/ALS	7.69	24.5	812	2.9	<0.05	<0.005	0.02	0.11	<0.005	<0.005	<0.005	<0.005	<0.005	<0.50	<0.005	0.015	<0.00067	0.0058	0.015	0.14	n/a	<0.005	n/a	<0.005	<0.005	231.83	<1	n/a	n/a	83.66	67.93	0.68	67.1	3.03	77	27	n/a	<0.008	9	494	43
AG-AS1	Arroyo La Junta	592023	2616906	Iban Murillo (CIBNOR)	2010-08-18	11:40:00	2010-08-19	CIBNOR/ASA/ALS	7.27	29.4	957	5.8	<0.05	<0.005	0.044	0.1	<0.005	<0.005	<0.005	<0.005	<0.005	<0.5	<0.005	0.16	<0.00067	0.0083	<0.005	0.31	n/a	<0.005	n/a	<0.005	<0.005	220.44	<1	n/a	n/a	111.12	97.32	0.6	72.5	3.75	88.9	28.1	n/a	<0.008	<9	668	460
AG-AS1	Arroyo La Junta	592023	2616906	Iban Murillo (CIBNOR)	2010-09-24	13:05:00	2010-09-24	CIBNOR/ASA/ALS	7.87	31.7	1046	6.4	<0.05	<0.005	0.036	0.13	<0.005	<0.005	<0.005	<0.005	<0.005	0.16	<0.005	0.13	<0.00067	0.007	0.014	0.92	n/a	<0.005	n/a	<0.005	<0.005	240.99	<1	n/a	n/a	83.45	102.22	0.49	79.6	4.17	87.1	32.6	n/a	<0.008	25	645	>2400
AG-AS1	Arroyo La Junta	592023	2616906	Iban Murillo (CIBNOR)	2010-10-21	11:35:00	2010-10-21	CIBNOR/ASA/ALS	8	23.6	1137	7.57	<0.05	<0.005	0.025	0.13	<0.005	<0.005	<0.005	<0.005	<0.005	0.22	<0.005	0.031	<0.00067	0.0071	0.029	0.47	n/a	<0.005	n/a	<0.005	<0.005	241.19	<1	n/a	n/a	68.9	85.21	0.24	99.9	3.88	86.8	37.1	n/a	<0.008	33	603	240
AG-AS1	Arroyo La Junta	592023	2616906	Iban Murillo (CIBNOR)	2010-11-24	12:45:00	2010-11-24	CIBNOR/ASA/ALS	8.17	24.4	790	8.18	<0.05	<0.005	0.03	0.11	<0.005	<0.005	<0.005	0.17	<0.005	<0.15	<0.005	0.045	<0.00067	0.0089	0.02	0.84	n/a	<0.005	n/a	<0.005	<0.005	231.46	<1	n/a	n/a	78.9	76.62	0.91	85.6	4.55	100	36.1	n/a	<0.008	52	608	460
AG-AS1	Arroyo La Junta	592023	2616906	Iban Murillo (CIBNOR)	2011-01-19	08:00:00	2011-01-19	CIBNOR/ASA/ALS	7.64	16.2	803	5.72	<0.05	<0.005	0.015	0.11	<0.005	<0.005	<0.005	<0.005	<0.005	<0.15	<0.005	0.034	<0.00067	0.0067	0.013	0.81	n/a	<0.005	n/a	<0.005	<0.005	230.67	n/a	n/a	n/a	64.36	63.87	0.46	65.5	4.52	74.3	28.5	n/a	<0.008	8	506	150
AG-AS2	Arroyo La Junta	590736	2616683	Baudilio Acosta (CIBNOR)	2010-05-17	10:11:00	2010-05-17	CIBNOR/ASA/ALS	7.87	25.4	1455	4.43	0.099	<0.005	0.054	0.11	<0.005	<0.005	<0.005	<0.005	0.013	<0.50	<0.005	0.18	<0.00067	<0.005	0.016	0.12	n/a	<0.005	n/a	<0.005	<0.005	224.6	<1	n/a	n/a	71.56	82.17	0.22	122	4.2	98.5	30.7	n/a	<.008	11	560	>2400
AG-AS2	Arroyo La Junta	590736	2616683	Baudilio Acosta (CIBNOR)	2010-06-14	10:57:00	2010-06-14	CIBNOR/ASA/ALS	8.02	28.4	1036	3.6	<0.05	<0.005	0.14	0.2	<0.005	<0.005	<0.005	<0.005	<0.005	<0.50	<0.005	0.63	<0.00067	<0.005	0.028	0.11	n/a	<0.005	n/a	<0.005	<0.005	320.33	<1	n/a	n/a	48.33	98.39	0.58	75.1	6.53	99.6	34.5	n/a	<0.008	59	611	>24,000
AG-AS2	Arroyo La Junta	590736	2616683	Baudilio Acosta (CIBNOR)	2010-07-13	sin agua	2010-07-13	sin agua
AG-AS2	Arroyo La Junta	590736	2616683	Iban Murillo (CIBNOR)	2010-08-18	sin agua	2010-08-18	CIBNOR/ASA/ALS
AG-AS2	Arroyo La Junta	590736	2616683	Iban Murillo (CIBNOR)	2010-09-27	08:42:00	2010-09-27	CIBNOR/ASA/ALS	7.78	24.5	1126	6.33	<0.05	<0.005	0.043	0.15	<0.005	<0.005	<0.005	<0.005	<0.005	<0.15	<0.005	0.14	<0.00067	0.0072	0.016	0.7	n/a	<0.005	n/a	<0.005	<0.005	246.96	<1	n/a	n/a	40.36	112.44	0.4	103	4.45	112	42.2	n/a	<0.008	15	726	1100
AG-AS2	Arroyo La Junta	590736	2616683	Iban Murillo (CIBNOR)	2010-10-20	10:50:00	2010-10-20	CIBNOR/ASA/ALS	8.06	23	935	7.64	<0.05	<0.005	0.034	0.14	<0.005	<0.005	<0.005	<0.005	<0.005	<0.15	<0.005	0.045	<0.00067	0.0085	0.0094	0.9	n/a	<0.005	n/a	<0.005	<0.005	223.48	<1	n/a	n/a	62.31	125.72	0.22	99.1	5.94	100	37.6	n/a	<0.008	<10	773	>2400
AG-AS2	Arroyo La Junta	590736	2616683	Iban Murillo (CIBNOR)	2010-11-26	09:05:00	2010-11-26	CIBNOR/ASA/ALS	7.98	17.7	1063	7.21	<0.05	<0.005	0.033	0.11	<0.005	<0.005	<0.005	<0.005	<0.005	0.2	<0.005	0.19	<0.00067	0.006	<0.005	0.44	n/a	<0.005	n/a	<0.005	<0.005	229.88	<1	n/a	n/a	100.23	116.11	0.89	77.3	1.18	85.2	35.9	n/a	<0.008	67	685	240
AG-AS2	Arroyo La Junta	590736	2616683	Iban Murillo (CIBNOR)	2011-01-19	08:35:00	2011-01-19	CIBNOR/ASA/ALS	7.88	12.1	1098	8.72	<0.05	<0.005	0.034	0.12	<0.005	<0.005	<0.005	<0.005	<0.005	<0.15	<0.005	<0.005	<0.00067	0.0064	0.007	0.93	n/a	<0.005	n/a	<0.005	<0.005	259.78	n/a	n/a	n/a	135.1	101.68	0.28	84.9	4.22	110	38.6	n/a	<0.008	5	733	>2400
[truncated: 3 more columns]
